# Supplementary material for: Survival Impact of Aggressive Treatment and PD-L1 Expression in Oligometastatic NSCLC
Source: MDPI journal article supplement (doi:10.3390/curroncol28010059), 2021-01-20
Supplement: s1 [file s1]

# Supplementary Materials: Survival Impact of Aggressive Treatment and PD-L1 Expression in Oligometastatic NSCLC

Camille Gauvin, Vimal Krishnan, Imane Kaci, Danh Tran-Thanh, Karine Bédard, Roula Albadine, Charles Leduc, Louis Gaboury, Normand Blais, Mustapha Tehfe, Bertrand Routy and Marie Florescu

Table 1. Treatment type and demographic characteristics of patients.

| Demographic characteristics | Treatment                                         |                                            |                                                |                                      |
|-----------------------------|---------------------------------------------------|--------------------------------------------|------------------------------------------------|--------------------------------------|
|                             | Aggressive at both sites<br>(Group A)<br>n=29 (%) | Primary site only<br>(Group B1)<br>n=4 (%) | Metastatic site only<br>(Group B2)<br>n=19 (%) | Palliative<br>(Group B3)<br>n=15 (%) |
| <b>Sex</b>                  |                                                   |                                            |                                                |                                      |
| Male                        | 15 (52)                                           | 0 (0)                                      | 13 (68)                                        | 10 (67)                              |
| <b>Smoking history</b>      |                                                   |                                            |                                                |                                      |
| Positive                    | 29 (100)                                          | 3 (75)                                     | 19 (100)                                       | 14 (93)                              |
| <b>Age at diagnosis</b>     |                                                   |                                            |                                                |                                      |
| <65                         | 23 (79)                                           | 3 (75)                                     | 13 (8)                                         | 6 (40)                               |
| ≥65                         | 6 (21)                                            | 1 (25)                                     | 6 (32)                                         | 9 (60)                               |
| <b>ECOG Score</b>           |                                                   |                                            |                                                |                                      |
| 0                           | 10 (35)                                           | 1 (25)                                     | 3 (16)                                         | 3 (20)                               |
| 1                           | 12 (41)                                           | 2 (50)                                     | 8 (42)                                         | 6 (40)                               |
| 2                           | 1 (4)                                             | 0 (0)                                      | 4 (21)                                         | 0 (0)                                |
| 3                           | 0 (0)                                             | 0 (0)                                      | 0 (0)                                          | 0 (0)                                |
| 4                           | 0 (0)                                             | 0 (0)                                      | 0 (0)                                          | 0 (0)                                |
| N/A                         | 6 (21)                                            | 1 (25)                                     | 4 (21)                                         | 6 (40)                               |

ECOG: Eastern Cooperative Oncology Group; N/A: not applicable.

**Table S2.** Survival of patients with aggressive or non-aggressive treatment classified by "Modified" Tumor Stage.

| 8 <sup>th</sup> IASLC Classification | Aggressive at Both Primary and Metastatic Sites<br><i>n</i> = 29 (%) | Non-Aggressive Treatments<br><i>n</i> = 38 (%) | <i>p</i> -value |
|--------------------------------------|----------------------------------------------------------------------|------------------------------------------------|-----------------|
| <b>Stage I, <i>n</i> = 18</b>        |                                                                      |                                                |                 |
| n                                    | 9 (31)                                                               | 9 (24)                                         |                 |
| OS (m)                               | 42                                                                   | 16                                             | 0.316           |
| PFS (m)                              | 12                                                                   | 12                                             | 0.669           |
| <b>Stage II, <i>n</i> = 13</b>       |                                                                      |                                                |                 |
| n                                    | 7 (24)                                                               | 6 (16)                                         |                 |
| OS (m)                               | 34                                                                   | 6                                              | 0.024           |
| PFS (m)                              | Not reached                                                          | 6                                              | 0.016           |
| <b>Stage III, <i>n</i> = 36</b>      |                                                                      |                                                |                 |
| n                                    | 13 (45)                                                              | 23 (60)                                        |                 |
| OS (m)                               | 22                                                                   | 4                                              | 0.001           |
| PFS (m)                              | 19                                                                   | 3                                              | 0.003           |

"Modified" Tumor Stage: refers to the combined stage T and N of the IASLC staging eighth edition; OS: overall survival; PFS: progression-free survival; (m): months.

**Table 3.** PD-L1 status and tumor site of subgroup of 39 patients.

| PD-L1 Status             | Lung Primary<br><i>n</i> (%) | Metastasis<br><i>n</i> (%) |
|--------------------------|------------------------------|----------------------------|
| Positive ( $\geq 25\%$ ) | 12 (55)                      | 8 (30)                     |
| Negative ( $< 25\%$ )    | 10 (45)                      | 19 (70)                    |
| Insufficient tissue      | 17                           | 12                         |

**Table 4.** PD-L1 concordance between primary and metastatic tissues in 10 patients.

| Patient | Age | Sex | Progression-Free Survival (months) | Overall Survival (months) | PD-L1 (Primary Site) | PD-L1 (Metastasis) | Concordance |
|---------|-----|-----|------------------------------------|---------------------------|----------------------|--------------------|-------------|
| 1       | 73  | F   | 55                                 | 55                        | -                    | +                  | No          |
| 2       | 54  | F   | 19                                 | 52                        | +                    | -                  | No          |
| 3       | 54  | M   | 4                                  | 4                         | +                    | +                  | Yes         |
| 4       | 47  | M   | 5.6                                | 32                        | -                    | -                  | Yes         |
| 5       | 47  | F   | 43                                 | 68                        | -                    | -                  | Yes         |
| 6       | 46  | F   | 3.7                                | 20                        | -                    | -                  | Yes         |
| 7       | 46  | F   | 6                                  | 15                        | +                    | +                  | Yes         |
| 8       | 69  | M   | 17.5                               | 20                        | -                    | -                  | Yes         |
| 9       | 56  | M   | 7.2                                | 16                        | -                    | -                  | Yes         |
| 10      | 59  | M   | 32                                 | 36                        | +                    | +                  | Yes         |
| Median  | 54  | -   | 12.4                               | 26                        | -                    | -                  | 80% (8/10)  |

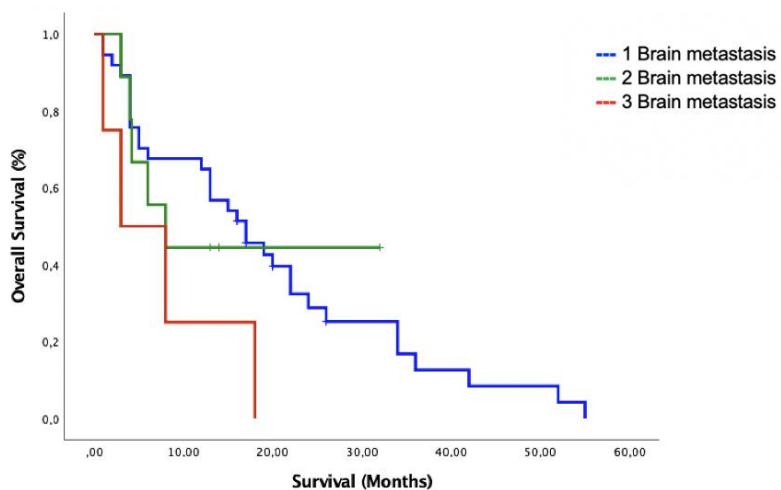

| Number of Brain Metastasis | n (%)<br>n total = 50 | Median OS (months) | OS 1 year (%) | OS 2 year (%) |
|----------------------------|-----------------------|--------------------|---------------|---------------|
| 1                          | 37 (74)               | 17                 | 65            | 29            |
| 2                          | 9 (18)                | 8                  | 44            | 44            |
| 3                          | 4 (8)                 | 3                  | 25            | 0             |
| p-value = 0.121            |                       |                    |               |               |

Figure S1. Overall survival based on the number of brain metastasis.

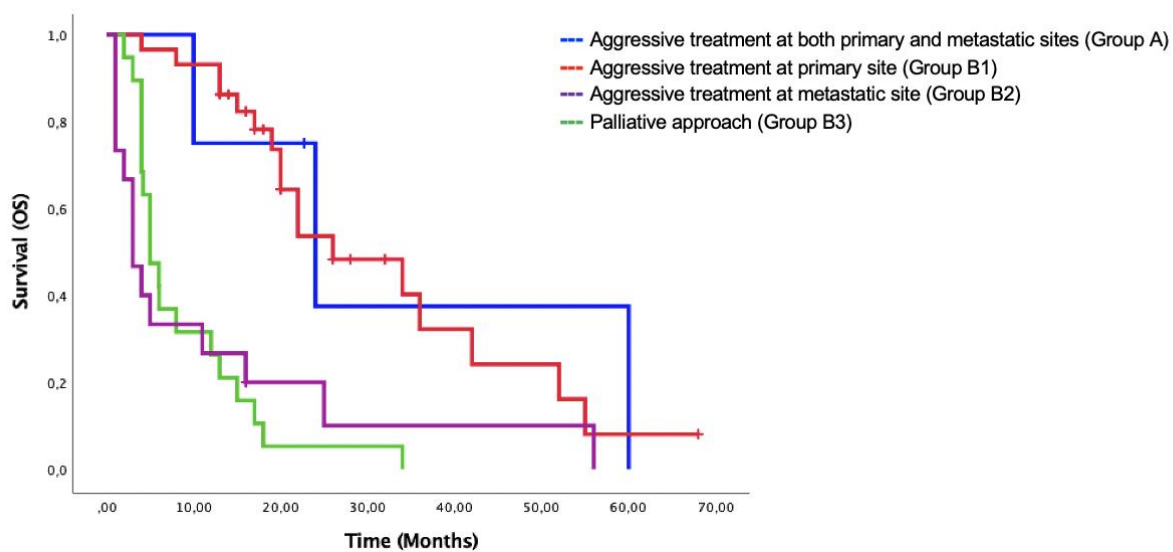

| Treatment                                                           | n=67 (%) | mOS (months) | OS 2 years (%) |
|---------------------------------------------------------------------|----------|--------------|----------------|
| Aggressive treatment at both primary and metastatic sites (Group A) | 29 (43)  | 26           | 54             |
| Aggressive treatment at primary site (Group B1)                     | 4 (6)    | 24           | 38             |
| Aggressive treatment at metastatic site (Group B2)                  | 19 (28)  | 5            | 5              |
| Palliative approach (Group B3)                                      | 15 (22)  | 3            | 20             |
| <b>p-value= 0.0001</b>                                              |          |              |                |

Figure S2. Overall survival comparison between four different therapeutic approaches.

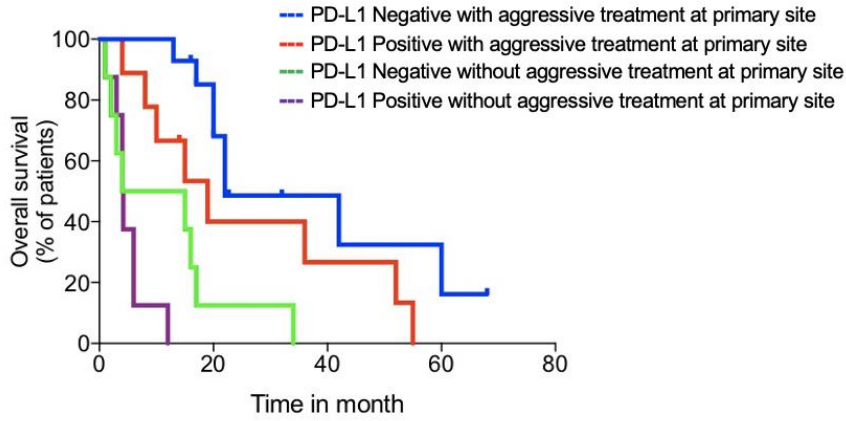

| Treatment                      | mOS (months) | mPFS (months) |
|--------------------------------|--------------|---------------|
| <b>PD-L1 Negative (n = 22)</b> |              |               |
| Curative Tx (n = 14)           | 22           | 12.2          |
| Palliative Tx (n = 8)          | 4            | 4             |
| <b>PD-L1 Positive (n = 17)</b> |              |               |
| Curative Tx (n = 9)            | 15           | 9.6           |
| Palliative Tx (n = 8)          | 4            | 3             |
| <b>p-value</b>                 | 0.04         | 0.22          |

**Figure S3.** Overall survival of 39 patients stratified by treatment of primary site and PD-L1 status. Kaplan-Meier overall survival analysis of patients with PD-L1 status available comparing PD-L1 status and treatment approach at primary site.

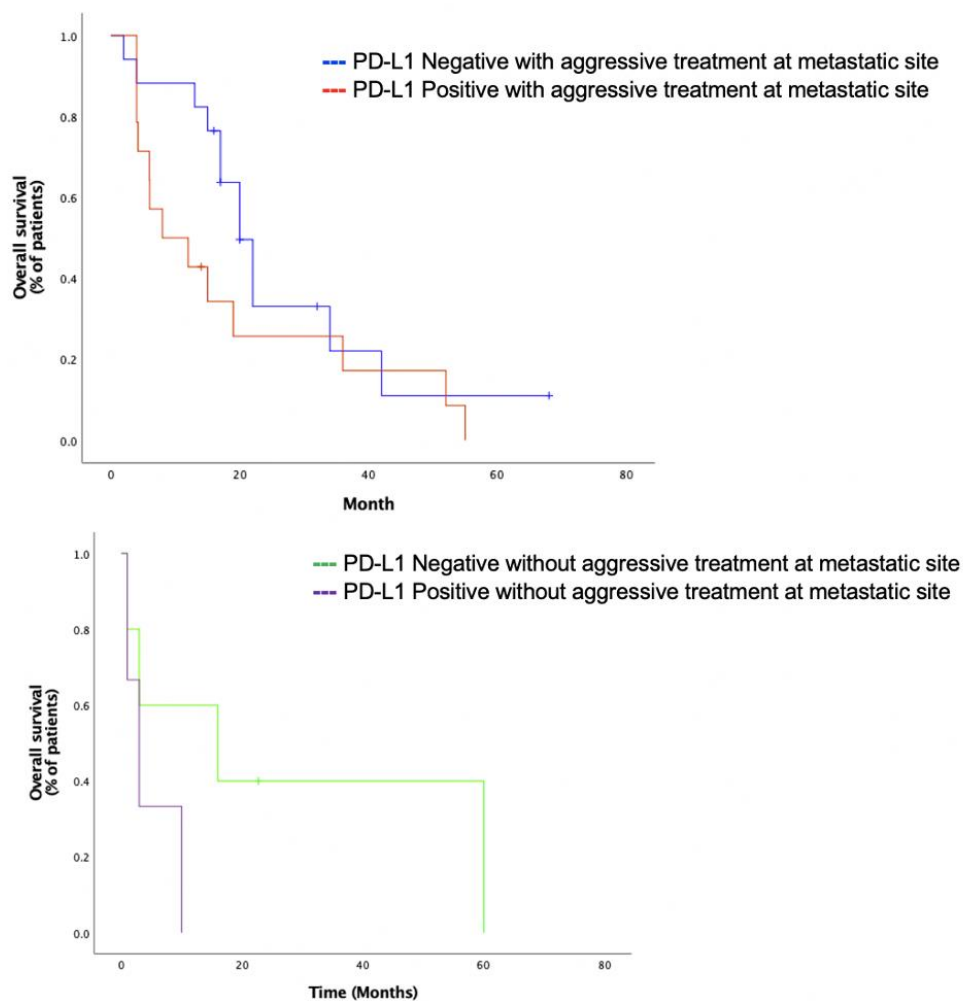

| Treatment                      | mOS (months) | mPFS (months) |
|--------------------------------|--------------|---------------|
| <b>PD-L1 Negative (n = 22)</b> |              |               |
| Curative Tx (n = 17)           | 20.0         | 12.2          |
| Palliative Tx (n = 5)          | 16.0         | 14.7          |
| <b>PD-L1 Positive (n = 17)</b> |              |               |
| Curative Tx (n = 14)           | 8.0          | 6.0           |
| Palliative Tx (n = 3)          | 3.0          | 3.0           |
| <b>p-value</b>                 | 0.07         | 0.15          |

**Figure S4.** Overall survival of 39 patients stratified by treatment of metastatic site and PD-L1 status. Kaplan-Meier overall survival analysis of patients with PD-L1 status available comparing PD-L1 status and treatment approach at metastatic site.

**Publisher’s Note:** MDPI stays neutral with regard to jurisdictional claims in published maps and institutional affiliations.

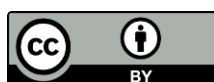

© 2020 by the authors. Licensee MDPI, Basel, Switzerland. This article is an open access article distributed under the terms and conditions of the Creative Commons Attribution (CC BY) license (<http://creativecommons.org/licenses/by/4.0/>).
